# Supplementary material for: Improvement of external quantum efficiency depressed by visible light-absorbing hole transport material in solid-state semiconductor-sensitized heterojunction solar cells
Source: Royal Society of Chemistry journal article supplement (doi:10.1039/c1nr11476j), 2011-11-25
Supplement: c1nr11476j.pdf [file c1nr11476j.pdf]

Electronic Supplementary Information

## Improvement of external quantum efficiency depressed by visible light-absorbing hole transport material in solid-state semiconductor-sensitized heterojunction solar cells

Choong-Sun Lim<sup>†</sup>, Sang Hyuk Im<sup>†</sup>, Jeong Ah Chang, Yong Hui Lee, Hi-jung Kim, and Sang Il Seok\*

Table S1. Summary of all device performances.

|        |   | $J_{sc}$<br>(mA/cm <sup>2</sup> ) | $V_{oc}$ (mV) | FF (%) | $\eta$ (%) |
|--------|---|-----------------------------------|---------------|--------|------------|
| AIBN-0 | 1 | 11.3                              | 552           | 61.6   | 3.9        |
|        | 2 | 11.2                              | 559           | 60.7   | 3.8        |
|        | 3 | 11.1                              | 559           | 57.2   | 3.5        |
|        | 4 | 11.3                              | 552           | 52.4   | 3.3        |
| AIBN-4 | 1 | 11.9                              | 566           | 66.7   | 4.5        |
|        | 2 | 11.5                              | 566           | 66.3   | 4.3        |
|        | 3 | 11.7                              | 559           | 66.7   | 4.4        |
|        | 4 | 11.9                              | 566           | 62.6   | 4.2        |
| AIBN-8 | 1 | 11.5                              | 566           | 59.7   | 3.9        |
|        | 2 | 11.3                              | 559           | 53.0   | 3.3        |
|        | 3 | 11.8                              | 559           | 52.3   | 3.4        |
|        | 4 | 11.8                              | 566           | 56.2   | 3.7        |

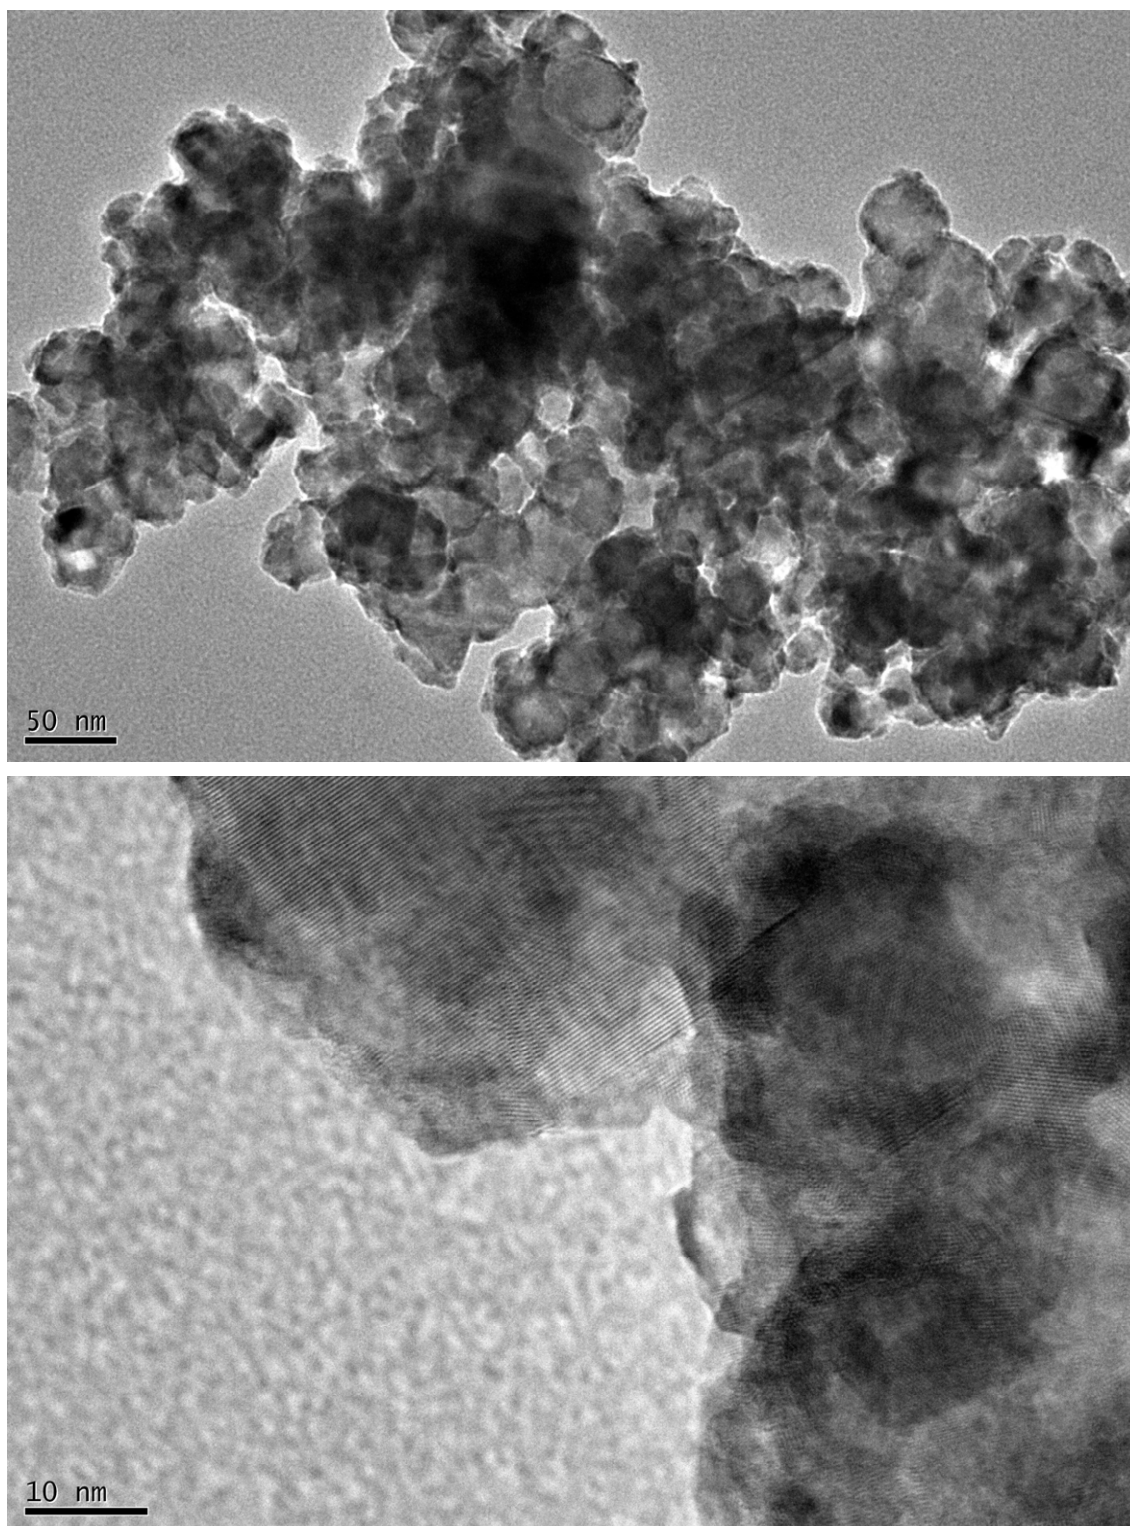

**Figure S1.** TEM images of Sb<sub>2</sub>S<sub>3</sub> deposited on mp-TiO<sub>2</sub>.
